# Supplementary material
Source: PubMed Central journal article supplement (PMC6625803)

# ICS

5/06/04

## PLEASE ADMINISTER THIS ENTIRE MEASURE VERBALLY

The following questions ask about your current relationship and your desired relationship with different people. Here's the first question [POINT TO QUESTION 1]. The 'S' stands for yourself [POINT]; the 'F' stands for your childhood family [POINT]. There are six pictures to choose from [POINT TO EACH PAIR OF CIRCLES]. Please circle the picture that best describes your relationship with these people. There are no right or wrong answers, so just circle whichever picture you think best describes your relationship. Please listen carefully to each question—each asks a slightly different question.

### NOTE TO INTERVIEWER:

- If the participant asks something like, "What do the circles mean?" Respond, "The circles just represent you and your family. You select the pair of circles that best shows the relationship between you and your family."
- If the participant then asks something like, "Do you mean are my feelings the same as my family's?" Respond, "Different people interpret the circles differently. There are no right or wrong answers, so just pick whichever pair of circles you think best shows the relationship between you and your family."
- **Childhood family:** "These questions ask about your present-day relationship with the family you grew up with, like your mom or dad, brothers or sisters."
- **Current family:** "These questions ask about everyone in your family now, like your spouse or your kids, as well as your other living relatives (for example, parents and siblings)."
- **Person closest with:** "... someone you feel close to, someone who is important or special to you."
- **Neighborhood:** "... people who live near where you live, maybe in your same building or on the same block, or in the same area of town."
- **Community at large:** "... all the people in your town, city or county; people in general."
- **Criminal community:** "... people who commit crimes whether they are in jail, prison, or living on the outside."

ID# \_\_\_\_\_

Date: \_\_\_\_\_

|                                        |
|----------------------------------------|
| <input type="checkbox"/> Phase I       |
| <input type="checkbox"/> Phase III: PT |
| <input type="checkbox"/> Phase III: PR |
| <input type="checkbox"/> ADC           |
| <input type="checkbox"/> OTH           |

# Self & Childhood Family

“These questions ask about your present-day relationship with the family you grew up with, like your mom or dad, brothers or sisters.”

Interviewer: Who does the participant consider her or his childhood family? \_\_\_\_\_

1. Circle the picture that best describes your relationship with your **childhood family**. (S = Self; F = Family)

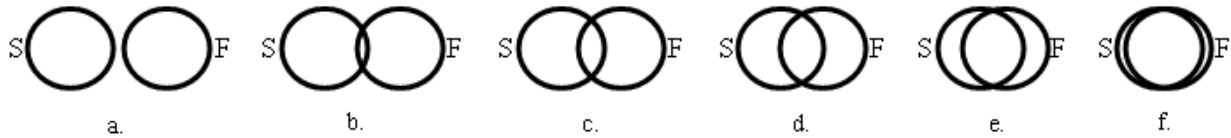

2. Circle the picture that best describes your **desired** relationship with your **childhood family**. (S = Self; F = Family)

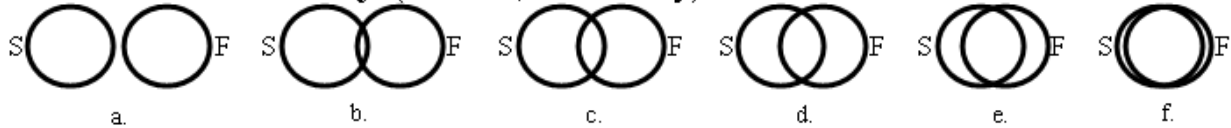

# Self & Current Family

“These questions ask about everyone in your family now, like your spouse or your kids, as well as your other living relatives (for example, parents and siblings).”

Interviewer: Is the Current Family different from the Childhood Family? \_\_\_\_\_ (answer only yes or no, any difference is a yes).

Interviewer: Who does the participant consider her or his current family? \_\_\_\_\_

3. Circle the picture that best describes your relationship with your **current family**. (S = Self; F = Family)

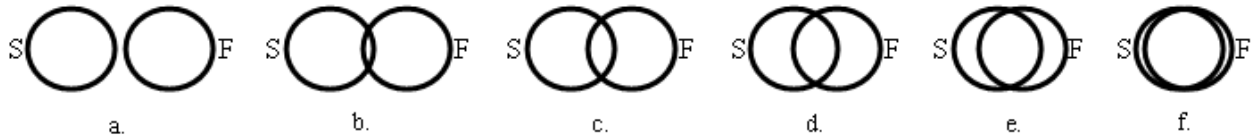

4. Circle the picture that best describes your **desired** relationship with your **current family**. (S = Self; F = Family)

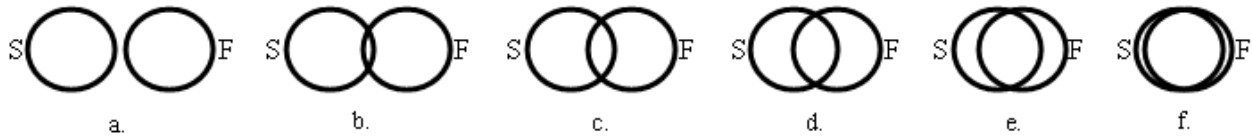

# Self & Person You're Closest With

"These questions ask about someone you feel close to, someone who is important or special to you."

5. Please write in the space below WHO is "the person you're closest with"?  
(spouse, partner, girlfriend/boyfriend, friend, family member, etc.)
- 

6. Circle the picture that best describes your relationship with the **person you're closest with**. ('S' = Self; 'P' = Person you're closest with)

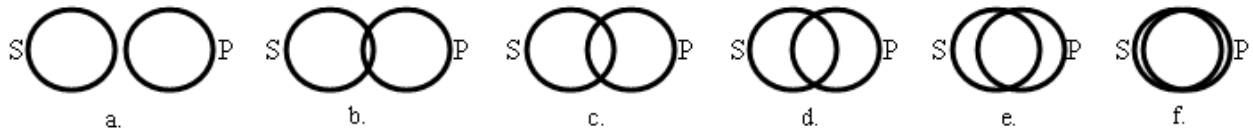

7. Circle the picture that best describes your **desired** relationship with the **person you're closest with**. ('S' = Self; 'P' = Person you're closest with)

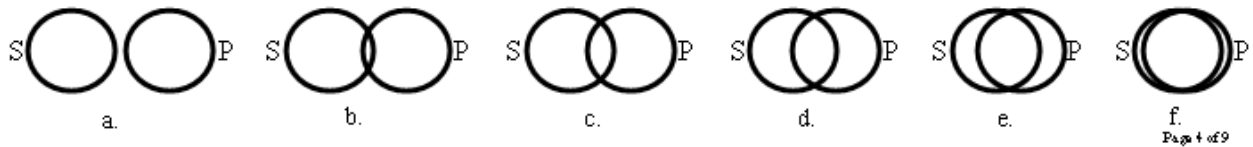

# Self & Neighborhood

“These questions ask about the people who live near where you live, maybe in your same building or on the same block, or in the same area of town.”

8. Circle the picture that best describes your relationship with your **neighborhood**. (*S* = *Self*; *N* = *Neighborhood*)

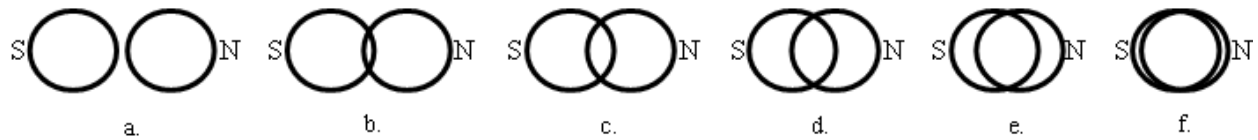

9. Circle the picture that best describes your **desired** relationship with your **neighborhood**. (*S* = *Self*; *N* = *Neighborhood*)

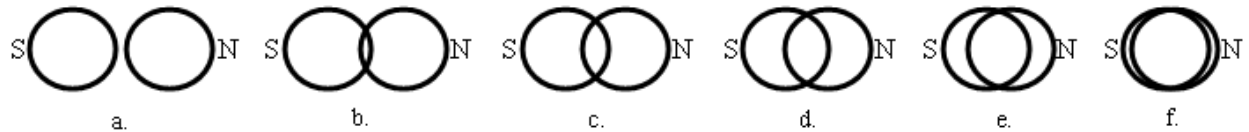

# Self & Community at Large

"These questions ask about all the people in your town, city or county; people in general."

10. Circle the picture that best describes your relationship with the **community at large**. ('S' = *Self*; 'C' = *Community*)

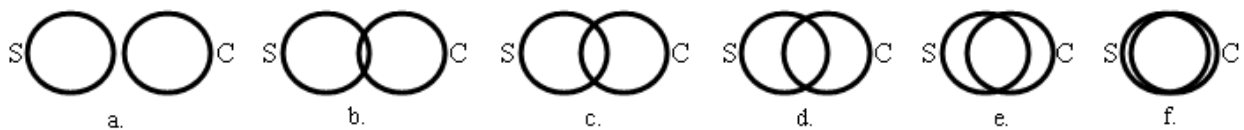

11. Circle the picture that best describes your **desired** relationship with the **community at large**. ('S' = *Self*; 'C' = *Community*)

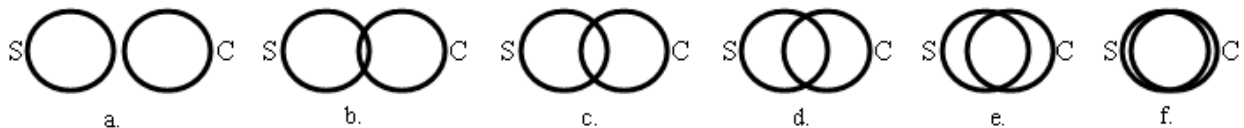

# Self & Criminal Community

"These questions ask about people who commit crimes whether they are in jail, prison, or living on the outside."

12. Circle the picture that best describes your relationship with the **criminal community**. ('S' = Self; 'C' = Criminal Community)

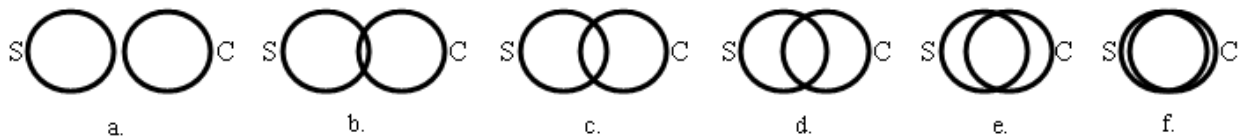

13. Circle the picture that best describes your **desired** relationship with the **criminal community**. ('S' = Self; 'C' = Criminal Community)

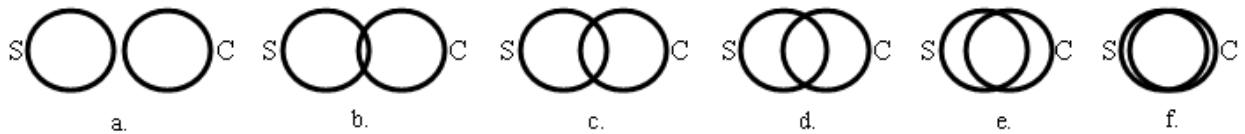

Supplement: NIHMS1024120-supplement-Supplemental_Material.pdf [file NIHMS1024120-supplement-Supplemental_Material.pdf]
